# Supplementary material for: Immunogenicity of a Candidate DTacP-sIPV Combined Vaccine and Its Protection Efficacy against Pertussis in a Rhesus Macaque Model
Source: MDPI journal article supplement (doi:10.3390/vaccines10010047), 2021-12-30
Supplement: s1 [file s1]

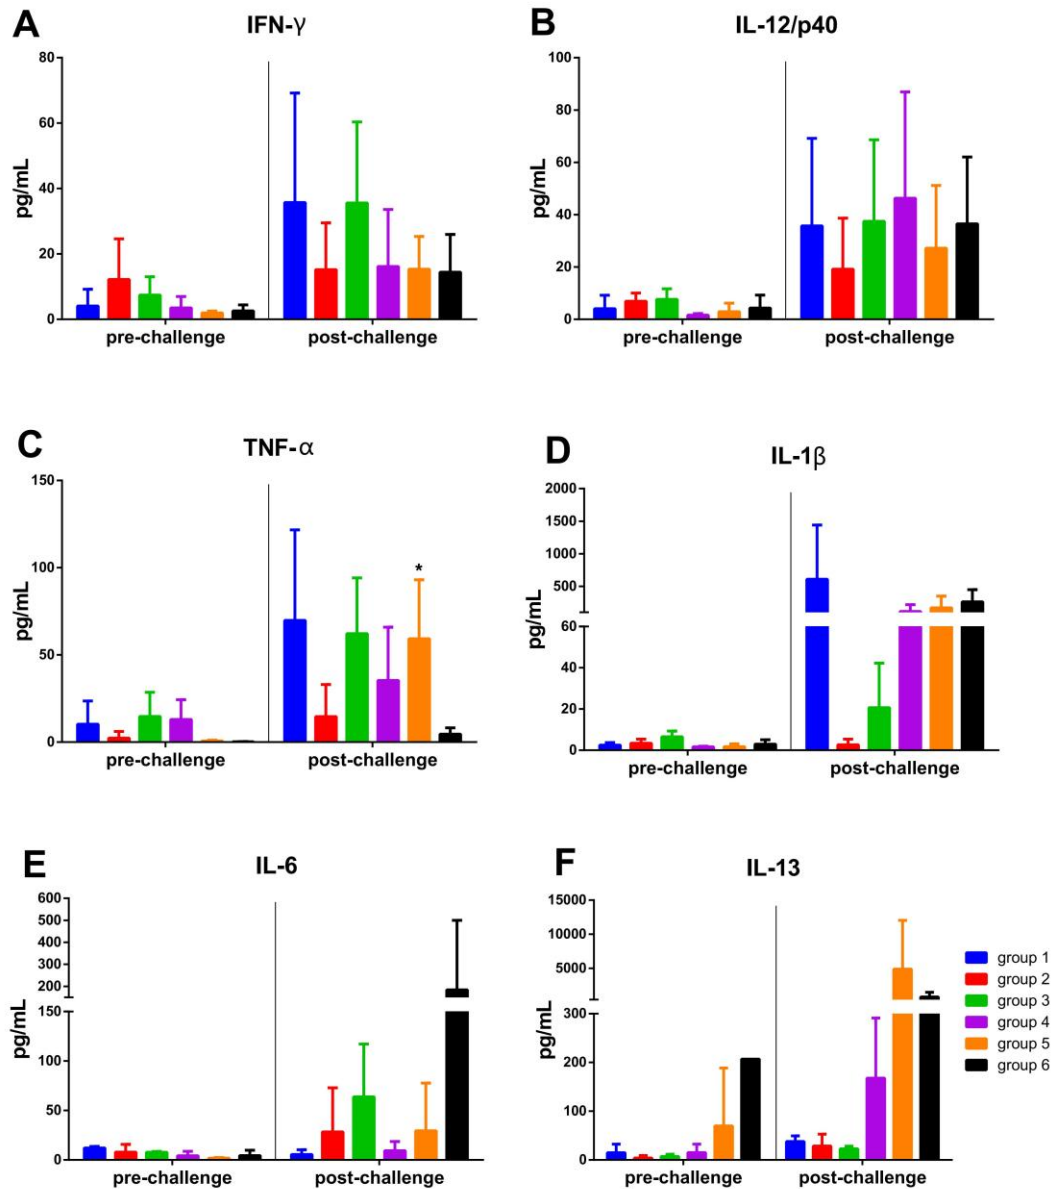

**Figure. S1 Dynamic profiles of cytokines after challenge.** The differences between the pre-challenge and peak cytokine production post-challenge period (3, 7, 14, 21, 28 days after challenge) were compared. Cytokines, including (A) IFN- $\gamma$ , (B) IL-12/p40, (C) TNF- $\alpha$ , (D) IL-1 $\beta$ , (E) IL-6, and (F) IL-13, were tested. The results are shown as the mean with SEM. Data were analyzed using an unpaired *t*-test. \*  $P < 0.05$  ( $n = 3$ ).
