# Supplementary material for: Immunogenicity of a Candidate DTacP-sIPV Combined Vaccine and Its Protection Efficacy against Pertussis in a Rhesus Macaque Model
Source: Vaccines (Basel). 2021 Dec 30;10(1):47. doi: 10.3390/vaccines10010047 (PMC8779802; doi:10.3390/vaccines10010047)
Supplement: Supplementary file 1 [file vaccines-10-00047-s001.zip › Supplymentary Table S1.xlsx]

## Sheet: S1
Supplementary Table 1. The GMCs/GMTs (95% CI) against different components of the combined vaccines after each doses of immunization
	Group 1				Group 2				Group 3				Group 4				Group 5
	Predose	Postdose1	Postdose2	Postdose3	Predose	Postdose1	Postdose2	Postdose3	Predose	Postdose1	Postdose2	Postdose3	Predose	Postdose1	Postdose2	Postdose3	Predose	Postdose1	Postdose2	Postdose3
PT (IU/ml)	0.9 (0.5-1.6)	325.8 (132.1-804.0)	721.1 (307.8-1686.7)	572.4 (282.1-1160.1)	0.6 (0.3-1.2)	389.6 (124.0-1226.2)	859.9 (381.1-1937.5)	811.2 (481.4-1370.0)	0.8 (0.3-2.6)	1201.0 (442.0-3258.5)	1351.2 (645.8-2817.1)	1243.3 (515.2-2998.4)	1.7 (0.6-5.0)	50.3 (24.5-103.4)	134.6 (49.8-363.8)	145.1 (53.0-397.6)	0.5 (0.4-0.7)	13.6 (9.3-19.7)	13.7 (9.4-20.1)	53.7 (4.8-597.2)
FHA(IU/ml)	0.8 (0.3-2.0)	420.5 (136.4-1296.1)	844.5 (230.4-3104.2)	605.9 (249.5-1468.4)	0.2 (0.1-0.5)	353.1 (133.1-936.4)	622.6 (339.4-1296.1)	613.5 (294.7-1278.3)	0.2 (0.1-0.9)	477.4 (266.5-854.5)	1045.5 (487.8-2225.6)	914.0 (336.9-2486.7)	0.4 (0.2-0.8)	60.9 (25.0-148.7)	194.0 (84.9-443.3)	192.5 (75.6-490.5)	0.4 (0.1-1.3)	12.2 (6.0-24.5)	79.3 (32.5-193.9)	180.3 (108.5-299.2)
PRN(IU/ml)	1.1 (0.6-1.8)	25.3 (10.7-59.7)	507.4 (219.6-1168.1)	480.7 (203.4-1136.2)	0.4 (0.3-0.5)	39.0 (13.4-113.8)	311.5 (110.1-880.4)	394.5 (235.2-661.7)	0.4 (0.3-0.6)	12.2 (11.7-12.7)	11.8 (11.2-12.4)	12.2 (11.7-12.7)	0.7 (0.2-2.3)	36.5 (12.0-111.0)	271.3 (130.2-565.0)	406.8 (211.9-780.9)	0.7 (0.2-2.0)	15.1 (13.2-17.4)	187.0 (78.2-447.0)	258.1 (153.0-435.3)
DT(IU/ml)	0.0 (0.0-0.2)	6.1 (2.4-15.7)	15.7 (5.4-46.1)	14.7 (4.8-45.3)	0.0 (0.0-0.0)	6.9 (3.0-15.6)	16.6 (8.0-34.5)	20.9 (13.3-32.8)	0.0 (0.0-0.3)	3.3 (1.8-6.2)	14.0 (8.1-24.2)	14.7 (6.6-32.9)	0.0 (0.0-0.5)	3.7 (1.3-10.1)	10.1 (4.2-24.3)	13.4 (6.0-29.9)
TT(IU/ml)	0.0 (0.0-0.0)	1.3 (0.4-4.0)	2.4 (0.6-9.3)	1.9 (0.5-7.7)	0.0 (0.0-0.0)	1.1 (0.4-2.7)	2.2 (1.4-3.6)	2.3 (1.8-2.9)	0.0 (0.0-0.0)	0.8 (0.3-2.0)	2.3 (1.0-5.6)	2.0 (0.6-7.0)	0.0 (0.0-0.0)	0.8 (0.5-1.5)	2.6 (1.2-5.9)	2.6 (0.9-7.3)
Polio I	0.0 (0.0-0.0)	476.4 (28.0-8079.2)	724.1 (104.7-4904.9)	1351.2 (562.2-3236.0)	0.0 (0.0-0.0)	76.1 (26.5-218.7)	608.9 (350.7-1060.1)	1024.0 (416.2-2521.4)	0.0 (0.0-0.0)	29.8 (0.7-1332.6)	718.6 (73.8-6984.8)	1136.2 (166.2-7750.1)
Polio II	0.0 (0.0-0.0)	16.0 (0.6-411.3)	53.8 (0.7-4182.1)	724.1 (52.4-10015.9)	0.0 (0.0-0.0)	2.4 (0.2-37.5)	90.5 (21.8-375.8)	861.1 (215.0-3444.3)	0.0 (0.0-0.0)	724.1 (240.4-6179.8)	512.0 (143.3-1833.0)	724.1 (382.9-1370.0)
Polio III	0.0 (0.0-0.0)	0.0 (0.0-0.0)	13.5 (0.6-319.6)	238.2 (6.4-8780.0)	0.0 (0.0-0.0)	0.0 (0.0-0.0)	17.7 (0.6-497.0)	73.0 (4.8-1120.6)	0.0 (0.0-0.0)	2.4 (0.2-37.5)	19.0 (0.3-1105.1)	476.4 (188.2-1209.3)
